# Supplementary material for: Apoptosis and autophagy markers predict survival in neoadjuvant treated oesophageal adenocarcinoma patients
Source: Springer Nature journal article supplement (doi:10.1186/s12885-022-09981-8), 2022-08-19
Supplement: 12885_2022_9981_MOESM1_ESM.pdf [file 12885_2022_9981_MOESM1_ESM.pdf]

**Additional file 1.** Univariate analysis of clinical, pathological and histological data of all patients relative to survival. Data is analysed by Kaplan-Meier (Log rank) test.

| Variables                              |             | Overall survival             | SE     | Log Rank test | p-value |
|----------------------------------------|-------------|------------------------------|--------|---------------|---------|
|                                        |             | Mean 95% Confidence Interval |        |               |         |
| <b>Tumour differentiation</b>          | Well        | 76.309(47.874-104.745)       | 14.508 | 10.517        | 0.005   |
|                                        | Moderate    | 55.348(44.069-66.627)        | 5.755  |               |         |
|                                        | Poor        | 39.744(40.215-54.643)        | 4.462  |               |         |
| <b>Mandard classification</b>          | No response | 48.326(40.654-55.999)        | 3.915  | 0.636         | 0.727   |
|                                        | Response    | 30.342(19.331-41.353)        | 5.618  |               |         |
|                                        | Unknown     | 43.181(24.136-62.226)        | 9.717  |               |         |
| <b>Lymph node stage</b>                | N0          | 77.170(66.040-88.300)        | 5.678  | 63.017        | < 0.001 |
|                                        | N1          | 43.812(33.343-54.280)        | 5.341  |               |         |
|                                        | N2          | 26.678(17.600-35.756)        | 4.632  |               |         |
|                                        | N3          | 17.235(13.017-21.453)        | 2.152  |               |         |
| <b>Lymphovascular invasion</b>         | Negative    | 73.394(60.926-85.862)        | 6.361  | 25.393        | < 0.001 |
|                                        | Positive    | 32.898(26.298-39.498)        | 3.367  |               |         |
| <b>Histological T stage</b>            | T1          | 59.205(47.893-70.517)        | 5.771  | 19.489        | < 0.001 |
|                                        | T2          | 72.094(55.864-88.324)        | 8.281  |               |         |
|                                        | T3          | 37.110(29.815-44.406)        | 3.722  |               |         |
|                                        | T4          | 20.059(8.541-8.541)          | 5.877  |               |         |
| <b>Circumferential Surgical margin</b> | Negative    | 66.664(56.591-76.737)        | 5.139  | 36.177        | < 0.001 |
|                                        | Positive    | 24.889(20.299-29.479)        | 2.342  |               |         |
